# Supplementary material for: Room-temperature photosynthesis of Zn(i) compounds with high air stability
Source: Royal Society of Chemistry journal article supplement (doi:10.1039/d3qi00436h), 2023-01-01
Supplement: d3qi00436h1.pdf [file d3qi00436h1.pdf]

## Electronic Supplementary Information

### Room-Temperature Photosynthesis of Zn(I) Compounds with High Air Stability

Yi-Min Lin,<sup>a,b</sup> Lu Liu,<sup>a</sup> Ming-Sheng Wang,<sup>\*a</sup> and Guo-Cong Guo<sup>\*a</sup>

<sup>a</sup> State Key Laboratory of Structural Chemistry, Fujian Institute of Research on the Structure of Matter, Chinese Academy of Sciences, Fuzhou, Fujian 350608, China

<sup>b</sup> College of Chemistry and Materials Science, Fujian Normal University, Fuzhou 350007, China

Email: [mswang@fjirsm.ac.cn](mailto:mswang@fjirsm.ac.cn); [gcguo@fjirsm.ac.cn](mailto:gcguo@fjirsm.ac.cn)

#### Index:

|                                                                                                             |    |
|-------------------------------------------------------------------------------------------------------------|----|
| <b>Tables</b> .....                                                                                         | S1 |
| <b>Table S1.</b> Crystal structure refinement data for <b>2</b> . .....                                     | S1 |
| <b>Table S2.</b> Selected bond lengths [Å] and angles [°] for <b>1</b> before coloration.....               | S2 |
| <b>Table S3.</b> Selected bond lengths [Å] and angles [°] for <b>2</b> before coloration.....               | S2 |
| <b>Table S4.</b> Selected hydrogen bond lengths [Å] for <b>1</b> and <b>2</b> . .....                       | S3 |
| <b>Figures</b> .....                                                                                        | S4 |
| <b>Figure S1.</b> TGA and DSC curves of <b>2</b> in nitrogen atmosphere. ....                               | S4 |
| <b>Figure S2.</b> Experimental and simulated PXRD patterns for <b>1</b> . .....                             | S4 |
| <b>Figure S3.</b> Experimental and simulated PXRD patterns for <b>2</b> . .....                             | S5 |
| <b>Figure S4.</b> IR spectra of <b>1</b> before and after irradiation. ....                                 | S5 |
| <b>Figure S5.</b> IR spectra of <b>2</b> before and after irradiation. ....                                 | S6 |
| <b>Figure S6.</b> Optical density difference of <b>2</b> .....                                              | S6 |
| <b>Figure S7.</b> Optical density difference of <b>2</b> .....                                              | S7 |
| <b>Figure S8.</b> Time-dependent UV-vis data of <b>1</b> and <b>2</b> at 369 and 355 nm, respectively. .... | S7 |
| <b>Figure S9.</b> UV-vis data of <b>1</b> using different light sources. ....                               | S8 |
| <b>Figure S10.</b> UV-vis data of <b>2</b> using different light sources. ....                              | S8 |

## Tables

**Table S1.** Crystal structure refinement data for **2**.

| Chemical formula                                                | $[\text{Zn}_2(\text{PA})_4(\text{bipy})]_n$ ( <b>2</b> ) |
|-----------------------------------------------------------------|----------------------------------------------------------|
| CCDC                                                            | 2244456                                                  |
| Formula weight                                                  | 579.20                                                   |
| Temperature (K)                                                 | 293(2)                                                   |
| Space group                                                     | <i>Pnma</i>                                              |
| <i>a</i> /Å                                                     | 16.7620(5)                                               |
| <i>b</i> /Å                                                     | 10.6688(5)                                               |
| <i>c</i> /Å                                                     | 14.1832(4)                                               |
| $\alpha$ /°                                                     | 90                                                       |
| $\beta$ /°                                                      | 90                                                       |
| $\gamma$ /°                                                     | 90                                                       |
| Volume/Å <sup>3</sup>                                           | 2536.39(16)                                              |
| <i>Z</i>                                                        | 4                                                        |
| <i>D<sub>c</sub></i> /g cm <sup>-3</sup>                        | 1.517                                                    |
| $\mu$ /mm <sup>-1</sup>                                         | 2.737                                                    |
| <i>F</i> (000)                                                  | 1192.0                                                   |
| GOF on <i>F</i> <sup>2</sup>                                    | 1.086                                                    |
| <i>R</i> <sub>1</sub> <sup>a</sup> ( <i>I</i> >2σ( <i>I</i> ))  | 0.0472                                                   |
| <i>wR</i> <sub>2</sub> <sup>b</sup> ( <i>I</i> >2σ( <i>I</i> )) | 0.1531                                                   |
| <i>R</i> <sub>1</sub> <sup>a</sup> (all data)                   | 0.0514                                                   |
| <i>wR</i> <sub>2</sub> <sup>b</sup> (all data)                  | 0.1580                                                   |

$$^a R_1 = \sum(F_o - F_c)/\sum F_o; \quad ^b wR_2 = [\sum w(F_o^2 - F_c^2)^2/\sum w(F_o^2)^2]^{1/2}$$

**Table S2.** Selected bond lengths [Å] and angles [°] for **1** before coloration.

| Bond                | Length/Å   | Angle                   | Angle/°   |
|---------------------|------------|-------------------------|-----------|
| Zn2-O12             | 2.3459(15) | O22-Zn2-N1 <sup>1</sup> | 94.18(6)  |
| Zn2-O32             | 1.9972(13) | O42-Zn2-N1 <sup>1</sup> | 91.79(6)  |
| Zn2-O42             | 2.2396(15) | O12-Zn1-N2              | 123.96(6) |
| Zn2-O22             | 2.0207(15) | N2-Zn1-O31              | 100.75(6) |
| Zn2-O41             | 2.0843(14) | N2-Zn1-O21              | 104.97(6) |
| Zn2-N1 <sup>1</sup> | 2.1682(16) | O32-Zn2-N1 <sup>1</sup> | 90.60(6)  |
| Zn1-O12             | 2.0082(14) | O41-Zn2-N1 <sup>1</sup> | 91.65(6)  |
| Zn1-O21             | 1.9488(15) | O22-Zn2-N1 <sup>1</sup> | 94.18(6)  |
| Zn1-O31             | 1.9815(14) | N11-Zn2-O12             | 170.46(6) |
| Zn1-O11             | 2.4750(15) |                         |           |
| N2-Zn1              | 2.0268(15) |                         |           |

**Table S3.** Selected bond lengths [Å] and angles [°] for **2** before coloration.

| Bond                 | Length/Å | Angle                                  | Angle/°    |
|----------------------|----------|----------------------------------------|------------|
| Zn1-N11 <sup>1</sup> | 2.030(3) | N11 <sup>1</sup> -Zn1-O41              | 85.90(19)  |
| Zn1-O31              | 1.940(3) | N11 <sup>1</sup> -Zn1-O41 <sup>2</sup> | 85.90(19)  |
| Zn1-O31 <sup>2</sup> | 1.940(3) | O31 <sup>2</sup> -Zn1-N11 <sup>1</sup> | 101.90(10) |
| Zn1-O41              | 2.417(7) | O31-Zn1-N11 <sup>1</sup>               | 101.90(10) |
| Zn1-O41 <sup>2</sup> | 2.417(7) | O42-Zn1-N11 <sup>1</sup>               | 132.72(17) |
| Zn1-O42              | 1.989(4) | N12-Zn2-O21                            | 86.53(11)  |
| Zn2-N12              | 2.174(3) | N12-Zn2-O21 <sup>2</sup>               | 86.53(11)  |
| Zn2-O21 <sup>2</sup> | 2.181(2) | N12-Zn2-O42                            | 179.88(14) |
| Zn2-O21              | 2.181(2) | O32-Zn2-N12                            | 90.08(9)   |
| Zn2-O32              | 2.011(2) | O32 <sup>2</sup> -Zn2-N12              | 90.08(9)   |
| Zn2-O32 <sup>2</sup> | 2.011(2) |                                        |            |
| Zn2-O42              | 2.202(4) |                                        |            |

Symmetry codes: <sup>1</sup>+X, +Y, 1+Z; <sup>2</sup>+X, 3/2-Y, +Z; <sup>1</sup>+X, +Y, 1+Z; <sup>2</sup>+X, 3/2-Y, +Z; <sup>3</sup>+X, +Y, -1+Z.

**Table S4.** Selected hydrogen bond lengths [ $\text{\AA}$ ] for **1** and **2**.

| <b><math>[\text{Zn}_2(\text{MAA})_4(\text{bipy})]_n</math> (1)</b>                      |                                       | <b><math>[\text{Zn}_2(\text{PA})_4(\text{bipy})]_n</math> (2)</b>                        |                                       |
|-----------------------------------------------------------------------------------------|---------------------------------------|------------------------------------------------------------------------------------------|---------------------------------------|
| <b>Bond</b>                                                                             | <b>Length/<math>\text{\AA}</math></b> | <b>Bond</b>                                                                              | <b>Length/<math>\text{\AA}</math></b> |
| $d_{1(\text{H}\cdots\text{O})}: \text{C2-H}_{\text{bipy}}\cdots\text{O41}_{\text{MAA}}$ | 2.486                                 | $d_{6(\text{H}\cdots\text{O})}: \text{C15-H}_{\text{bipy}}\cdots\text{O21}_{\text{PA}}$  | 2.379                                 |
| $d_{2(\text{H}\cdots\text{O})}: \text{C2-H}_{\text{bipy}}\cdots\text{O22}_{\text{MAA}}$ | 3.429                                 | $d_{7(\text{H}\cdots\text{O})}: \text{C12-H}_{\text{bipy}}\cdots\text{O21}_{\text{PA}}$  | 2.629                                 |
| $d_{3(\text{H}\cdots\text{O})}: \text{C5-H}_{\text{bipy}}\cdots\text{O22}_{\text{MAA}}$ | 3.070                                 | $d_{8(\text{H}\cdots\text{O})}: \text{C12-H}_{\text{bipy}}\cdots\text{O32}_{\text{PA}}$  | 3.033                                 |
| $d_{4(\text{H}\cdots\text{O})}: \text{C6-H}_{\text{bipy}}\cdots\text{O11}_{\text{MAA}}$ | 3.884                                 | $d_{9(\text{H}\cdots\text{O})}: \text{C11-H}_{\text{bipy}}\cdots\text{O31}_{\text{PA}}$  | 3.536                                 |
| $d_{5(\text{H}\cdots\text{O})}: \text{C6-H}_{\text{bipy}}\cdots\text{O21}_{\text{MAA}}$ | 2.420                                 | $d_{10(\text{H}\cdots\text{O})}: \text{C11-H}_{\text{bipy}}\cdots\text{O41}_{\text{PA}}$ | 2.598                                 |

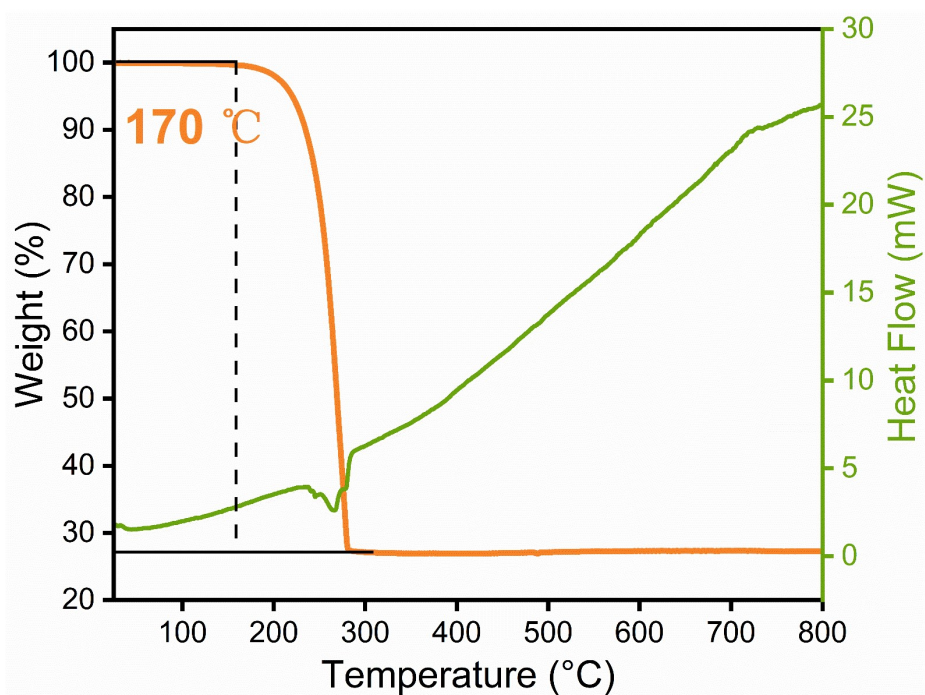

**Figure S1.** TGA and DSC curves of **2** in nitrogen atmosphere with the ramp rate of 10 °C/min.

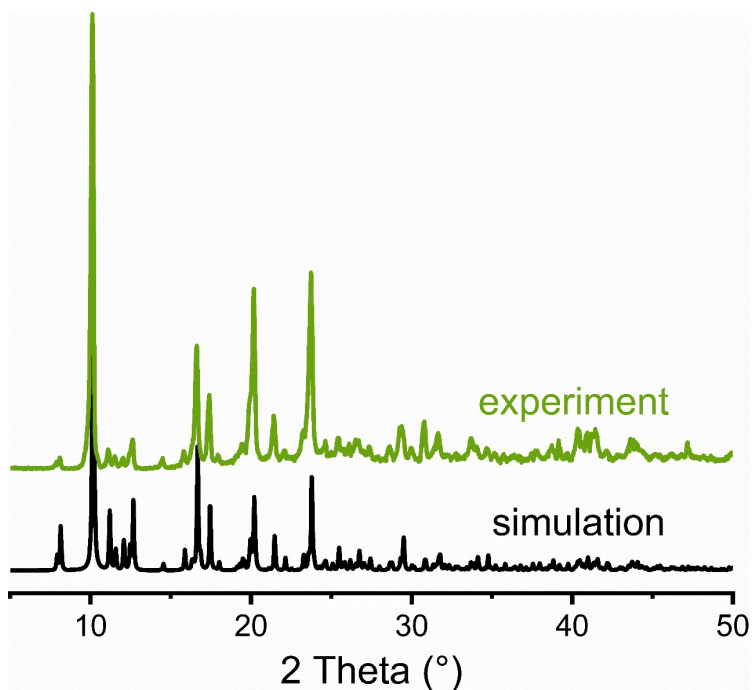

**Figure S2.** Experimental and simulated PXRD patterns for **1**. The time for irradiation-treatment was 30 min.

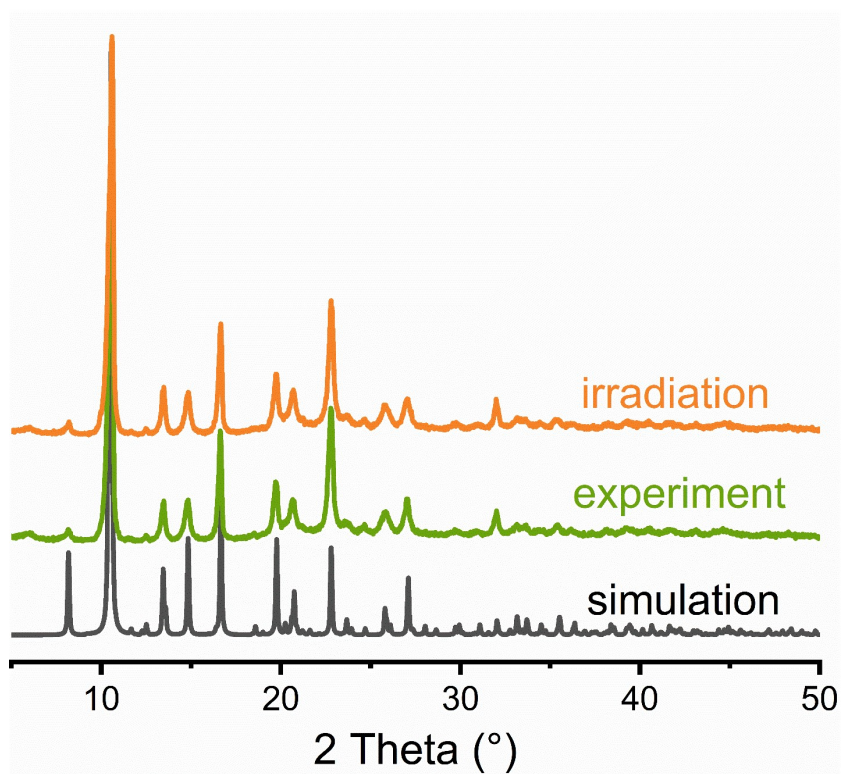

**Figure S3.** Experimental and simulated PXRD patterns for **2**. The time for irradiation-treatment was 30 min.

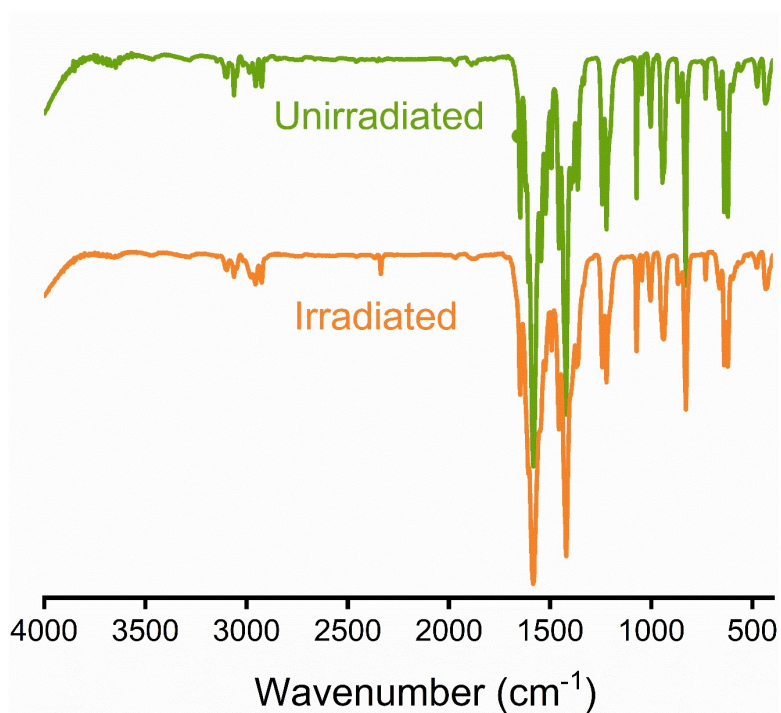

**Figure S4.** IR spectra of **1** before and after irradiation. The time for irradiation-treatment was 30 min.

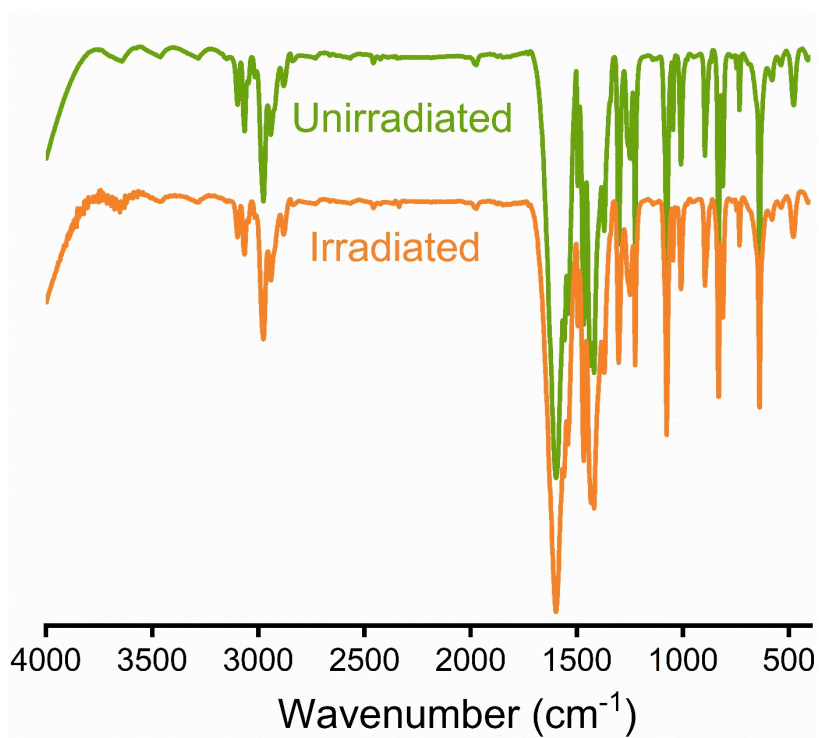

**Figure S5.** IR spectra of **2** before and after irradiation. The time for irradiation-treatment was 30 min.

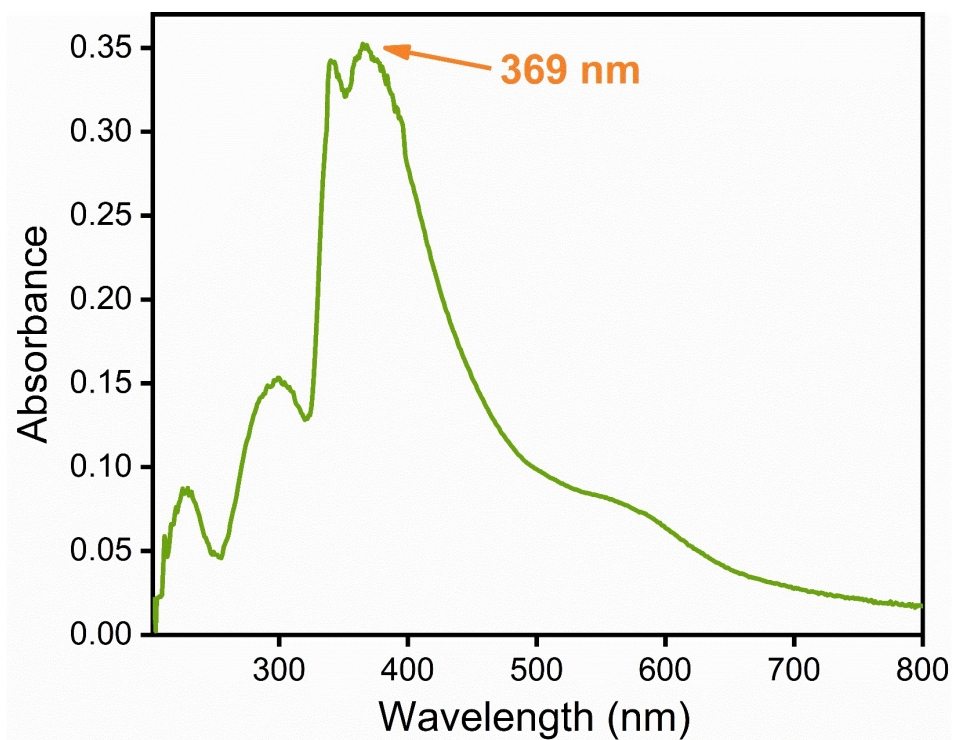

**Figure S6.** Optical density difference of **2**. The time for irradiation-treatment was 30 min.

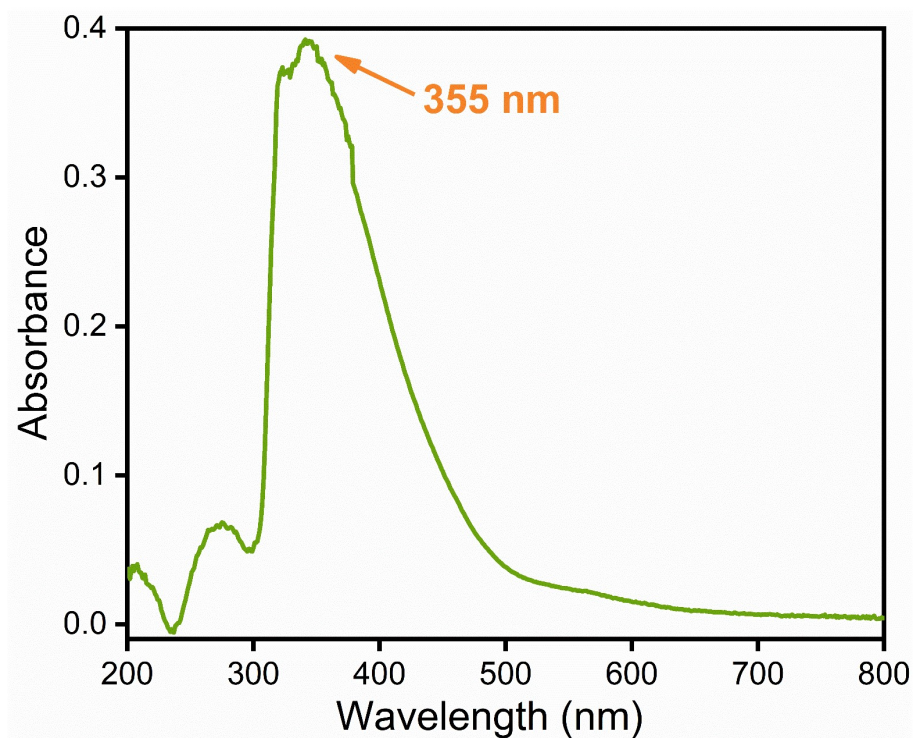

Figure S7. Optical density difference of **2**. The time for irradiation-treatment was 30 min.

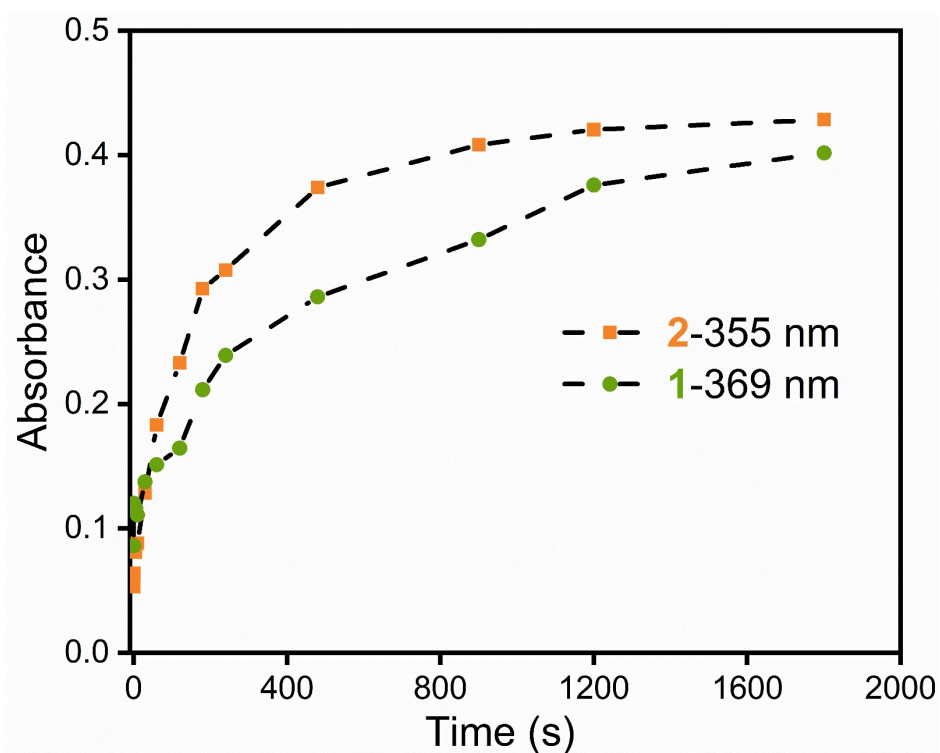

Figure S8. Time-dependent UV-vis data of **1** and **2** monitored at 369 and 355 nm, respectively.



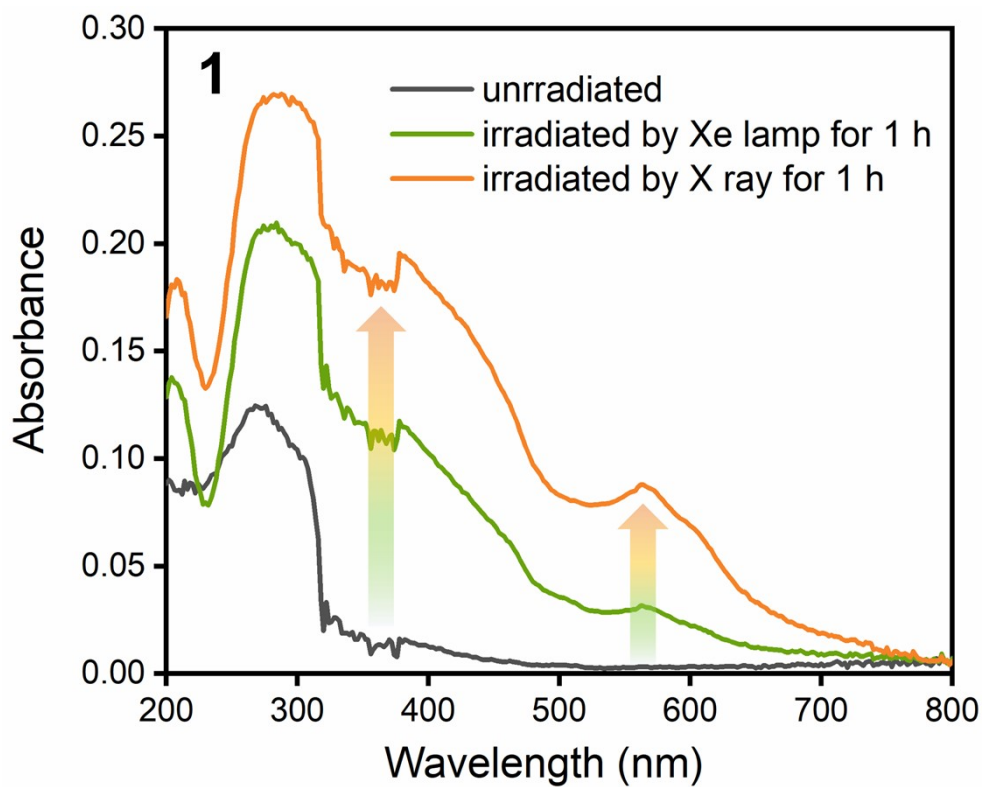

Figure S9. UV-vis data of **1** using different light sources.

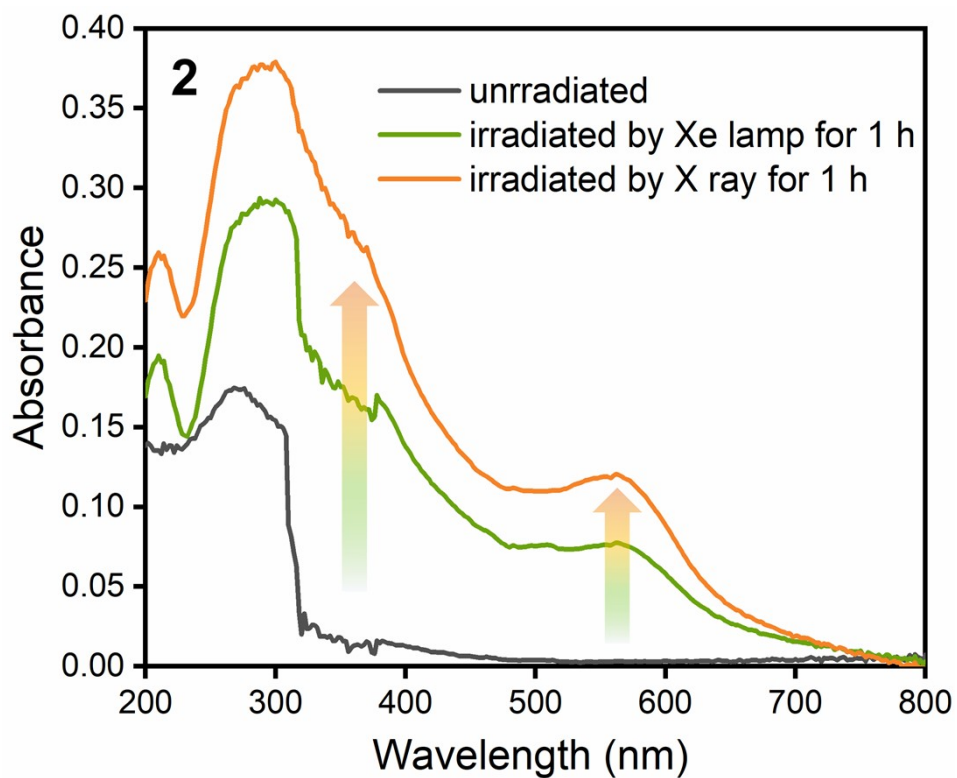

Figure S10. UV-vis data of **2** using different light sources.
